# Supplementary material
Source: Springer Nature journal article supplement (https://www.springermedizin.de/resource/supplementary/13075_2010_9714_MOESM3_ESM.pdf/9693360)

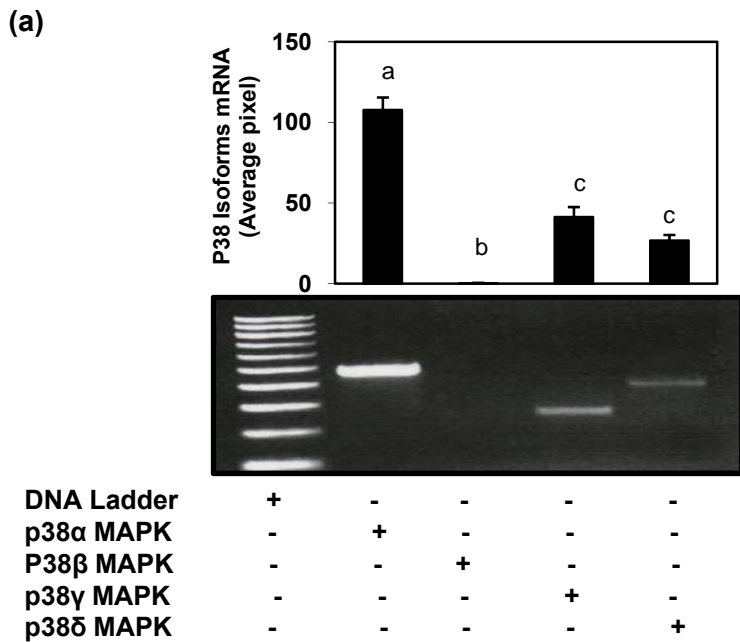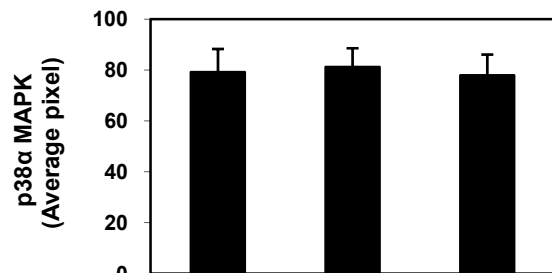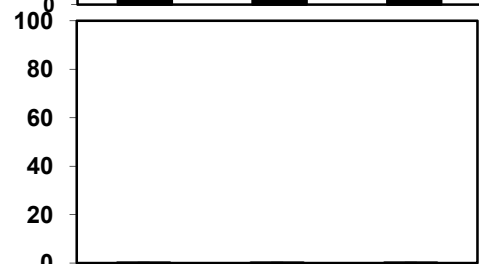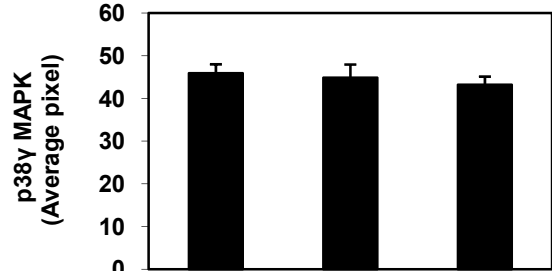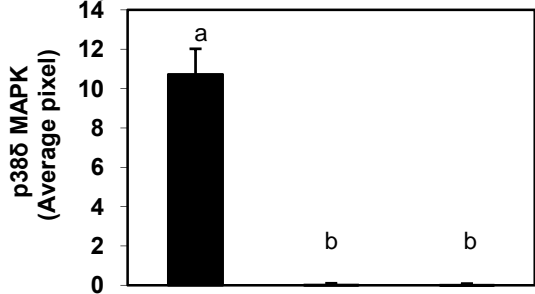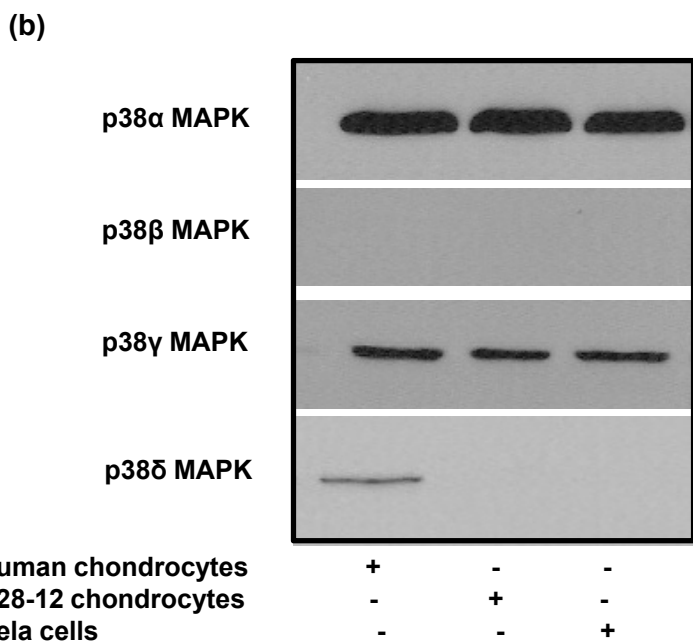

Human chondrocytes  
C28-12 chondrocytes  
HeLa cells

Supplement: MOESM3 [file 9693360]
